# Supplementary material for: Exercise alleviates diabetic complications by inhibiting oxidative stress-mediated signaling cascade and mitochondrial metabolic stress in GK diabetic rat tissues
Source: Frontiers journal article supplement (doi:10.3389/fphys.2022.1052608), 2022-12-01
Supplement: Data_Sheet_1.PDF [file Data_Sheet_1.PDF]

# ORIGINAL WESTERN BLOT IMAGES FOR FIGURES 6-9

## For Figure 6:

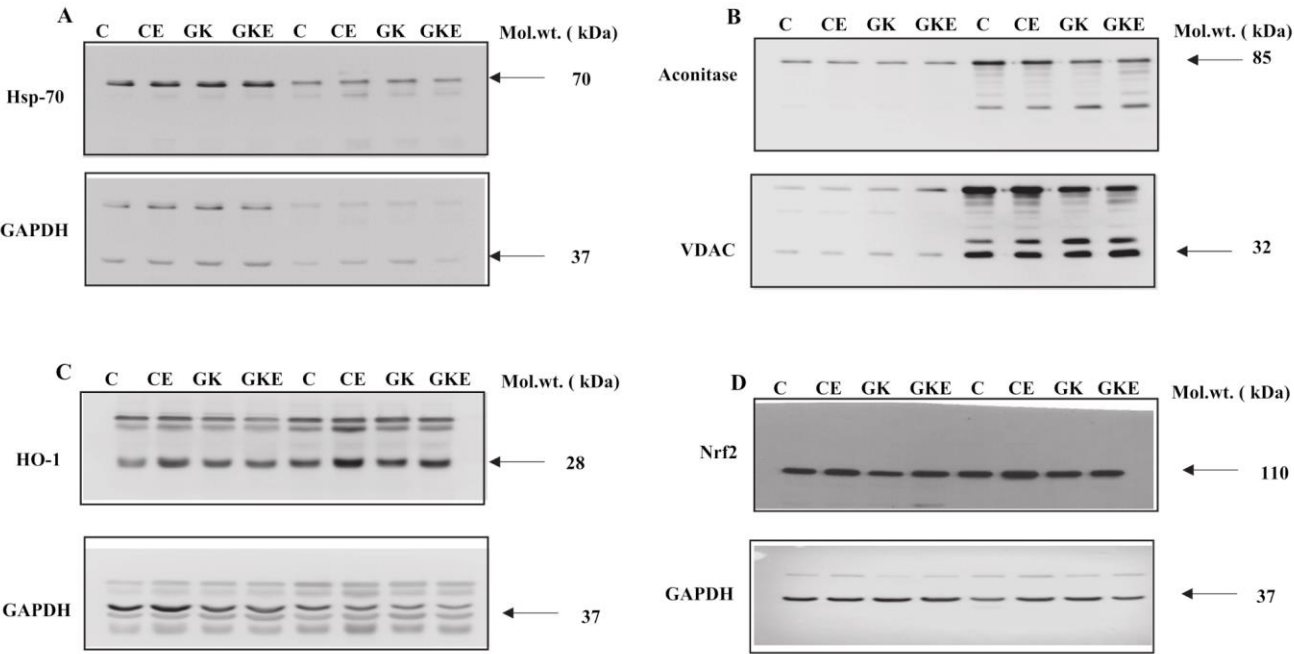

**Supplementary Figure 6:** Original blots of the stress-sensitive marker proteins, Hsp-70 (A), mitochondrial Aconitase (B), HO-1 (C), and Nrf2 (D) which were visualized using the Sapphire Biomolecular Imager (Azure Biosystems, Dublin, U.S.A) or by exposure to X-ray films. GAPDH and VDAC were used as loading controls for cytosolic and mitochondrial fractions respectively. Immunoreactive bands were quantitated using Image Studio Lite, ver.5.2 (LI-COR Biosciences, Lincoln, U.S.A). Molecular weights of the respective proteins are indicated in kDa.

## For Figure 7:

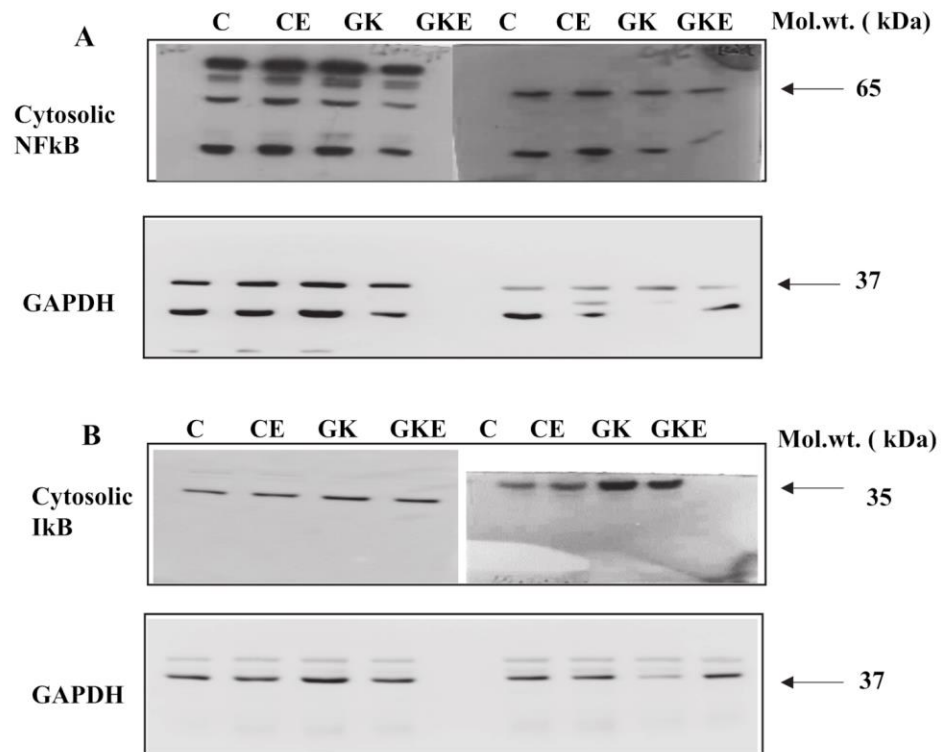

**Supplementary Figure 7:** Original blots of the inflammatory marker proteins, NFκB-p65 (A), and IκB (B) which were visualized using the Sapphire Biomolecular Imager (Azure Biosystems, Dublin, U.S.A) or by exposure to X-ray films. GAPDH was used as the loading control. Immunoreactive bands were quantitated using Image Studio Lite, ver.5.2 (LI-COR Biosciences, Lincoln, U.S.A). Molecular weights of the respective proteins are indicated in kDa.

## For Figure 8:

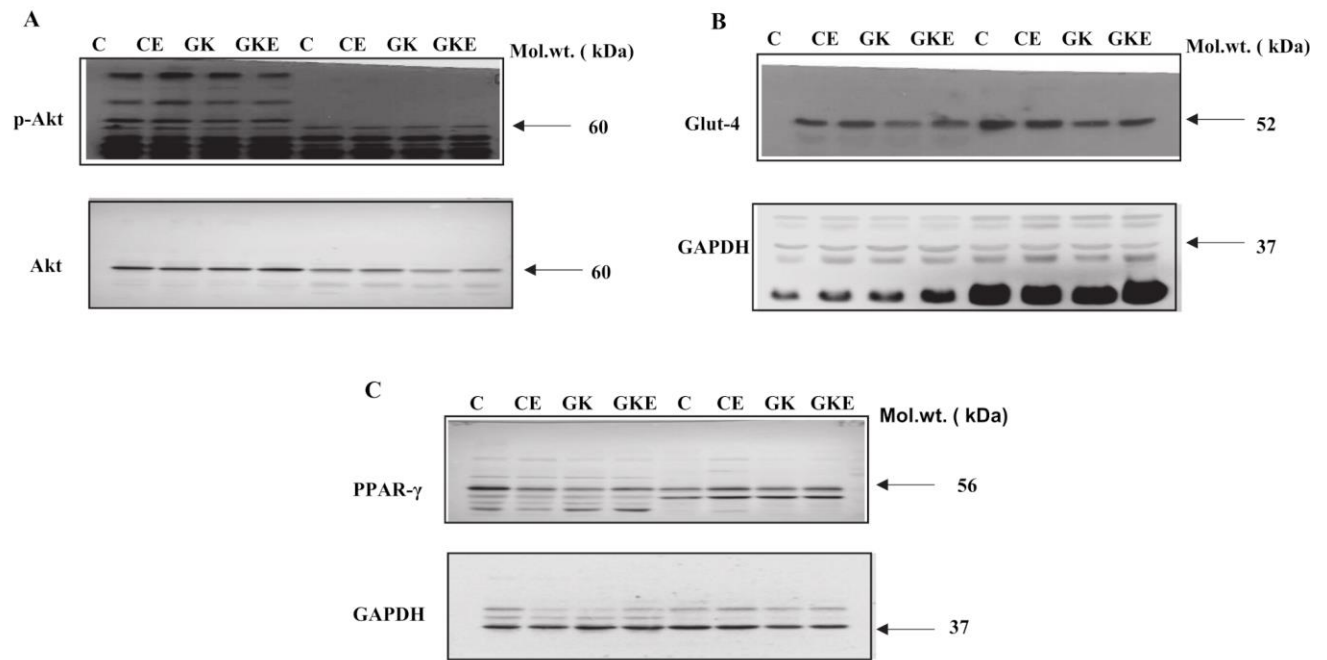

**Supplementary Figure 8:** Original blots of the cell-signaling marker proteins, p-Akt (A), glucose transporter protein, Glut-4 (B), and PPAR- $\gamma$  (C) which were visualized using the Sapphire Biomolecular Imager (Azure Biosystems, Dublin, U.S.A) or by exposure to X-ray films. Total protein or GAPDH was used as the loading control. Immunoreactive bands were quantitated using Image Studio Lite, ver.5.2 (LI-COR Biosciences, Lincoln, U.S.A). Molecular weights of the respective proteins are indicated in kDa.

# For Figure 9:

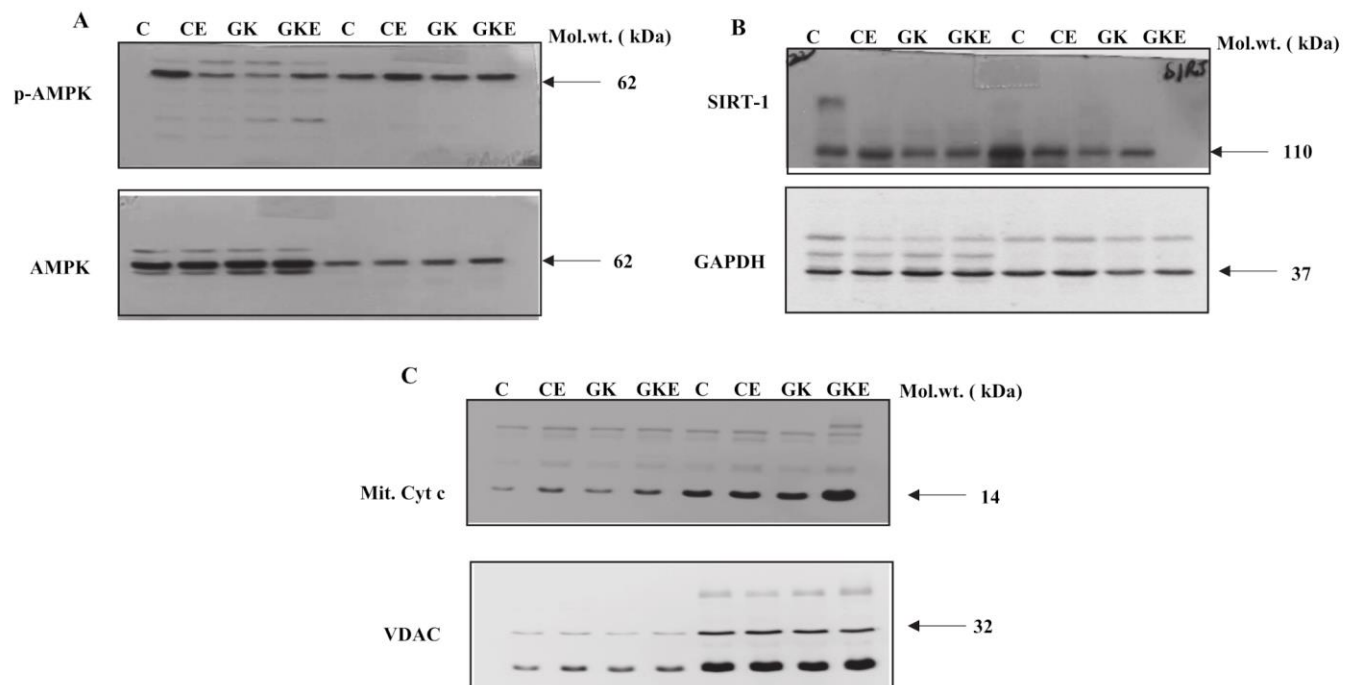

**Supplementary Figure 9:** Original blots of the proteins regulating energy metabolism, p-AMPK (A), SIRT-1 (B), and mitochondrial cytochrome c (C) which were visualized using the Sapphire Biomolecular Imager (Azure Biosystems, Dublin, U.S.A) or by exposure to X-ray films. Total protein and GAPDH were used as loading controls for p-AMPK and SIRT-1 respectively, and VDAC for the mitochondrial fraction. Immunoreactive bands were quantitated using Image Studio Lite, ver.5.2 (LI-COR Biosciences, Lincoln, U.S.A). Molecular weights of the respective proteins are indicated in kDa.
